# Supplementary material for: A novel and rapid approach for the synthesis of biocompatible and highly stable Fe3O4/SiO2 and Fe3O4/C core/shell nanocubes and nanorods
Source: Royal Society of Chemistry journal article supplement (doi:10.1039/c6nj03697j), 2017-01-01
Supplement: c6nj03697j1.pdf [file c6nj03697j1.pdf]

## Supplementary materials

for

### A novel and rapid approach for the synthesis of biocompatible and highly stable Fe<sub>3</sub>O<sub>4</sub>/SiO<sub>2</sub> and Fe<sub>3</sub>O<sub>4</sub>/C core/shell nanocubes and nanorods

Mohamed Abbas<sup>1,2,3\*</sup>, Sri RamuluTorati<sup>1</sup>, Asif Iqbal<sup>1</sup>, CheolGi Kim<sup>1,\*</sup>

<sup>1</sup>Department of Emerging Materials Science, DGIST, Daegu, 711-873, South Korea

<sup>2</sup>Ceramics Department, National Research Centre, 12622 El-Bohouth Str, Cairo, Egypt

<sup>3</sup>State Key Laboratory of Coal Conversion, Institute of Coal Chemistry, Chinese Academy of Science, Taiyuan 030001, China

Fig. S1

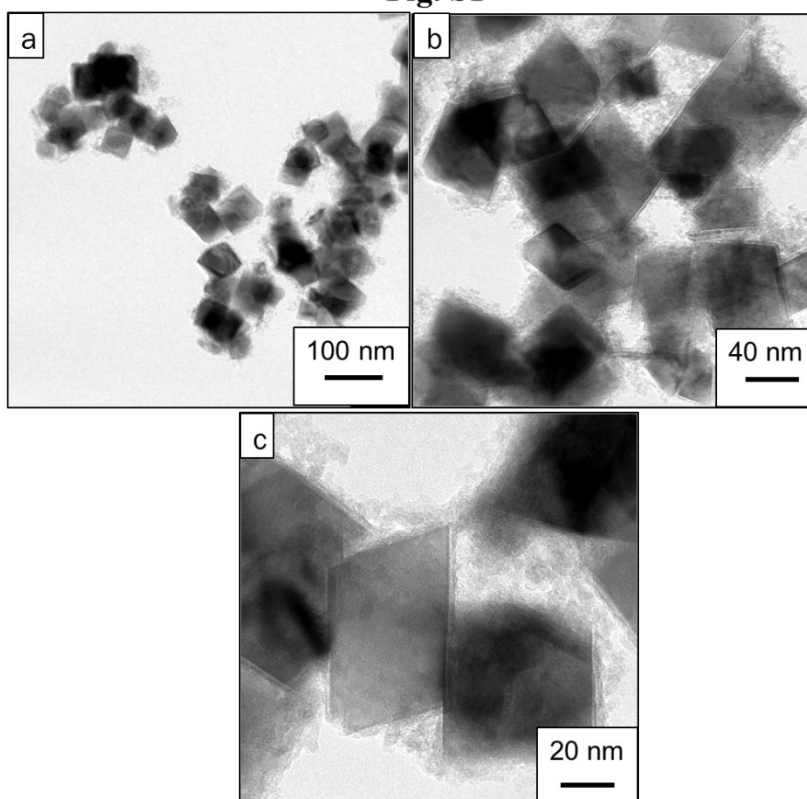

**Fig S1.** TEM images of  $\text{Fe}_3\text{O}_4/\text{SiO}_2$  nanocubes with 2 mL TEOS; (a) low magnification and (b, c) high magnification.

**Fig. S2**

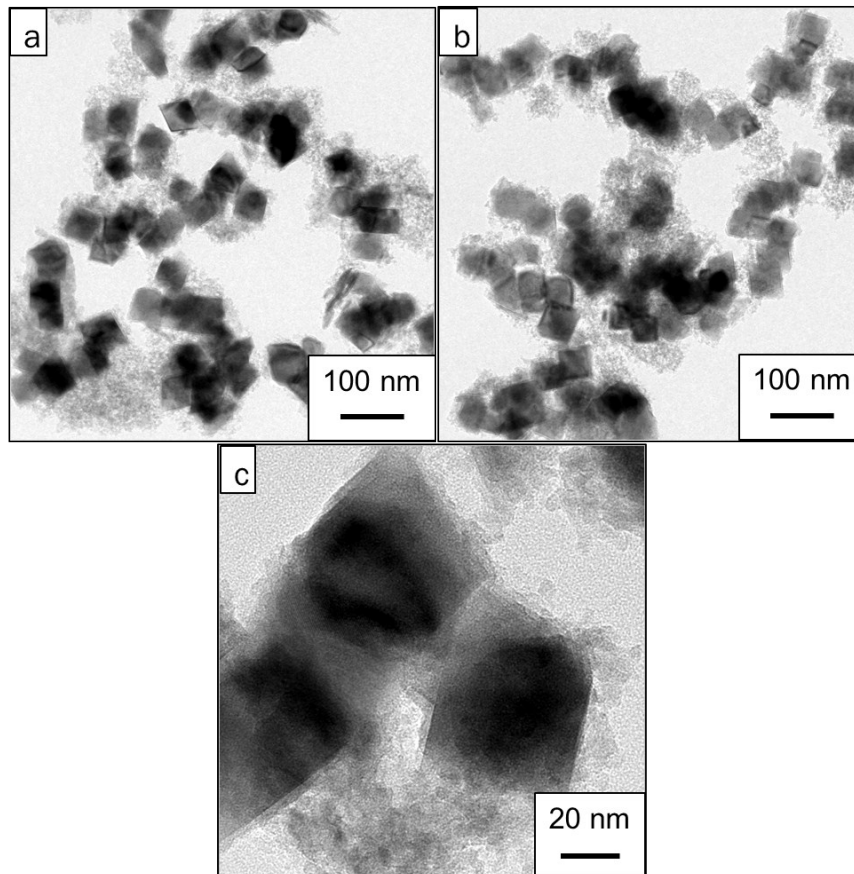

**Fig S2.** TEM images of  $\text{Fe}_3\text{O}_4/\text{SiO}_2$  nanocubes with 4 mL TEOS; (a) low magnification and (b, c) high magnification.

**Fig. S3**

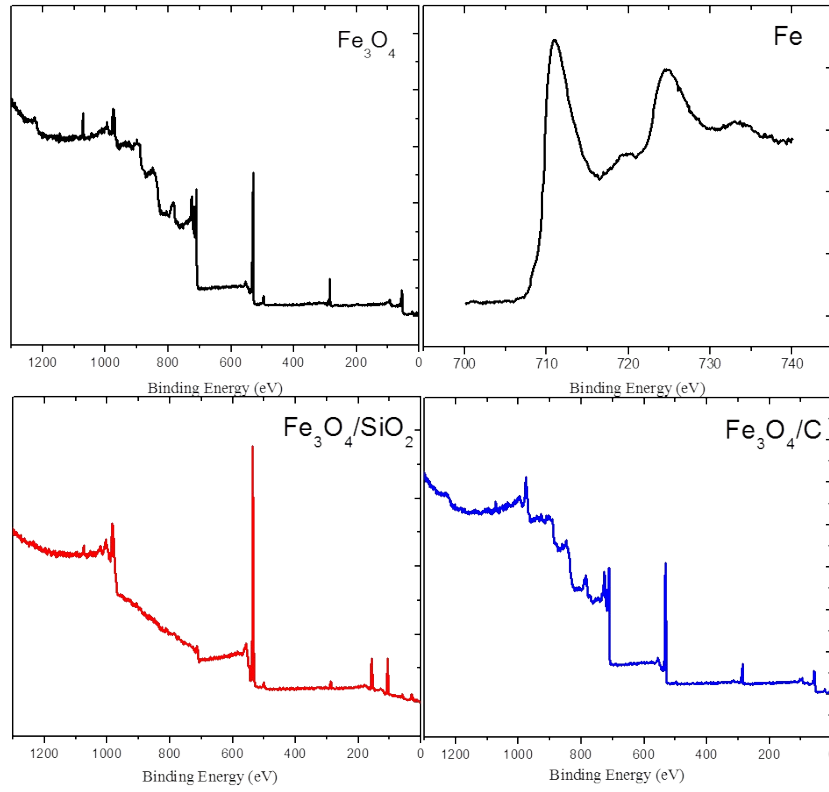

**Fig S3.** XPS survey spectra of  $\text{Fe}_3\text{O}_4$ ,  $\text{Fe}_3\text{O}_4/\text{SiO}_2$  and  $\text{Fe}_3\text{O}_4/\text{C}$  core/shell nanocubes

**Fig. S4**

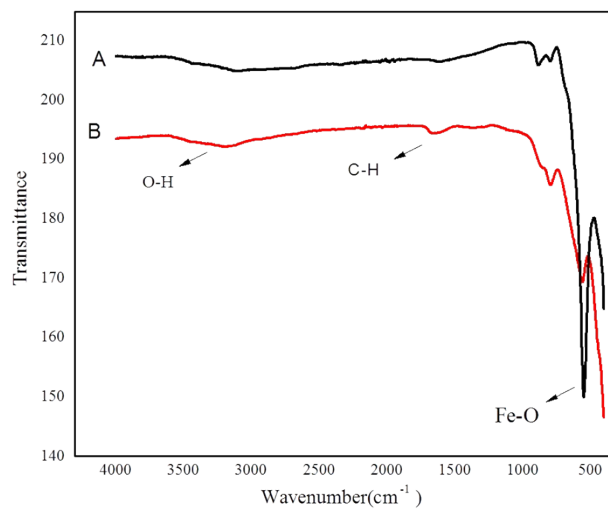

**Fig S4.** FTIR analysis data for both (A) Fe<sub>3</sub>O<sub>4</sub> nanocubes and (B) Fe<sub>3</sub>O<sub>4</sub>/C synthesized in the presence of ultrasound.

**Fig. S5**

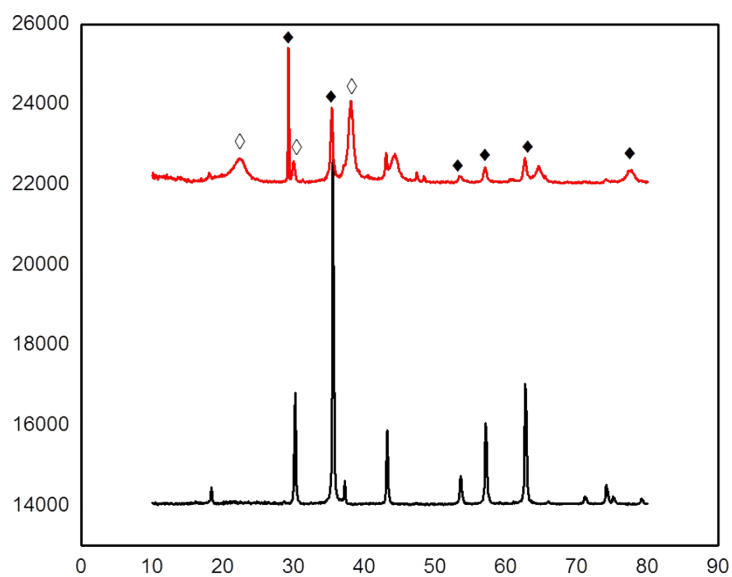

**Fig S5.** XRD patterns of (A) as-prepared Fe<sub>3</sub>O<sub>4</sub> nanocubes and (B) Fe<sub>3</sub>O<sub>4</sub>/C synthesized in the presence of ultrasound.
